# Supplementary material
Source: ML conference proceedings conference paper supplement (https://openaccess.thecvf.com/content/CVPR2023/html/Zhu_PMatch_Paired_Masked_CVPR_2023_paper.html)
Supplement: Supplementary file 1 [file Zhu_PMatch_Paired_Masked_CVPR_2023_supplemental.pdf]

# PMatch: Paired Masked Image Modeling for Dense Geometric Matching

## ==== Supplementary Material ====

Shengjie Zhu and Xiaoming Liu  
 Department of Computer Science and Engineering,  
 Michigan State University, East Lansing, MI, 48824  
 zhusheng@msu.edu, liuxm@cse.msu.edu

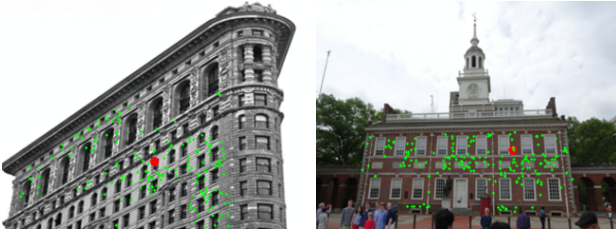

Figure 1. **Visualization of produced co-planar points in MegaDepth Dataset.** The red point is one anchor point  $\mathbf{p}_m$ , while the green dots are the co-planar pixels among  $K$  sampled candidates  $\{\mathbf{q}_n^m \mid 1 \leq n \leq K\}$ , computed following Eqn. 1.

**Production of the indicator matrix  $\mathcal{O}^+$ .** In the main paper Eqn. 14, we utilize an indicator matrix  $\mathcal{O}^+$  to indicate the co-planar pairs between anchor and candidate points. Given the  $K$  anchor points  $\{\mathbf{p}_m \mid 1 \leq m \leq K\}$  and  $K \times K$  candidate points  $\{\mathbf{q}_n^m \mid 1 \leq n \leq K\}$ , the indicator matrix  $\mathcal{O}^+$  of size  $K \times K$  is computed as:

$$\mathcal{O}_{m,n}^+ = 1 \quad \text{if} \quad \begin{cases} 1 - \arccos(\mathbf{n}_{\mathbf{p}_m}^\top \mathbf{n}_{\mathbf{q}_n^m}) < k_1 \\ \text{dist}(\mathbf{n}_{\mathbf{p}_m}, \mathbf{p}_m, d_{\mathbf{p}_m}, \mathbf{q}_n^m, d_{\mathbf{q}_n^m}, \mathbf{K}_1) < k_2 \\ \|\text{proj}(\mathbf{H}_{\mathbf{p}_m}^\top, \mathbf{q}_n^m) - \mathbf{q}_n^m\|_2 < k_3. \end{cases} \quad (1)$$

The function  $\text{dist}(\cdot)$  computes the point-to-plane distance in 3D space. The plane is spanned by the norm  $\mathbf{n}_{\mathbf{p}_m}$  and the re-projected 3D point at  $\mathbf{p}_m$ . The function  $\text{proj}(\cdot)$  indicates the planar projection under pixel  $\mathbf{p}_m$  homography matrix  $\mathbf{H}_{\mathbf{p}_m}$  (see main paper equation Eqn. 13). The  $k_1, k_2$  and  $k_3$  are set to 0.002, 0.02, and 1 respectively. We visualize the produced groundtruth co-planar points in Fig. 1.

**Additional Visualization.** We include additional visualization of the paired MIM pretexting task (Fig. 2) and reconstruction visualization (Fig. 4 and Fig. 3).

## References

- [1] Zhengqi Li and Noah Snavely. Megadepth: Learning single-view depth prediction from internet photos. In *CVPR*, 2018. 2

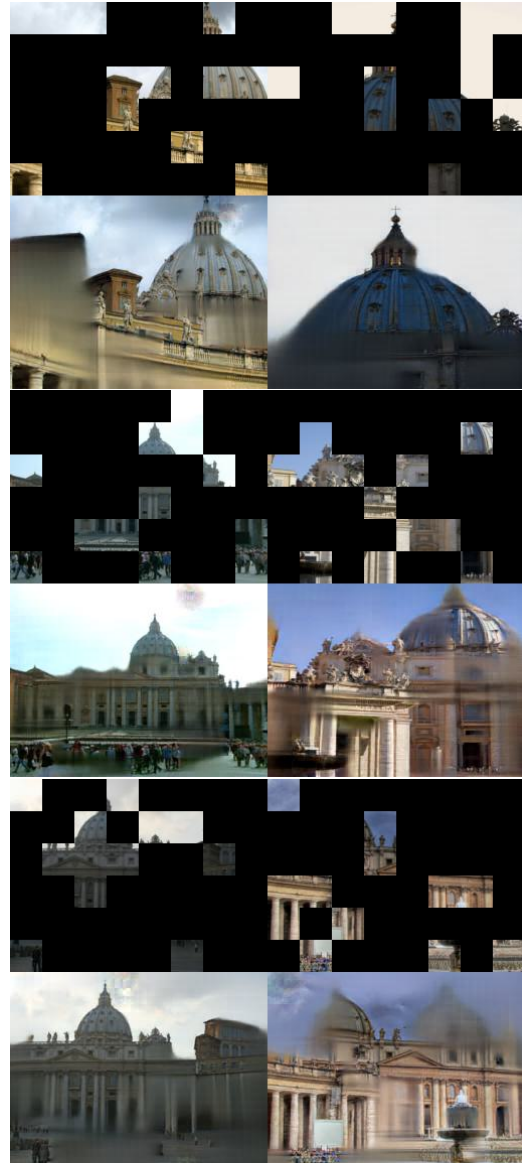

Figure 2. **Visual Quality of the paired MIM pretext task.** Visualized cases are from the MegaDepth and the ScanNet dataset.

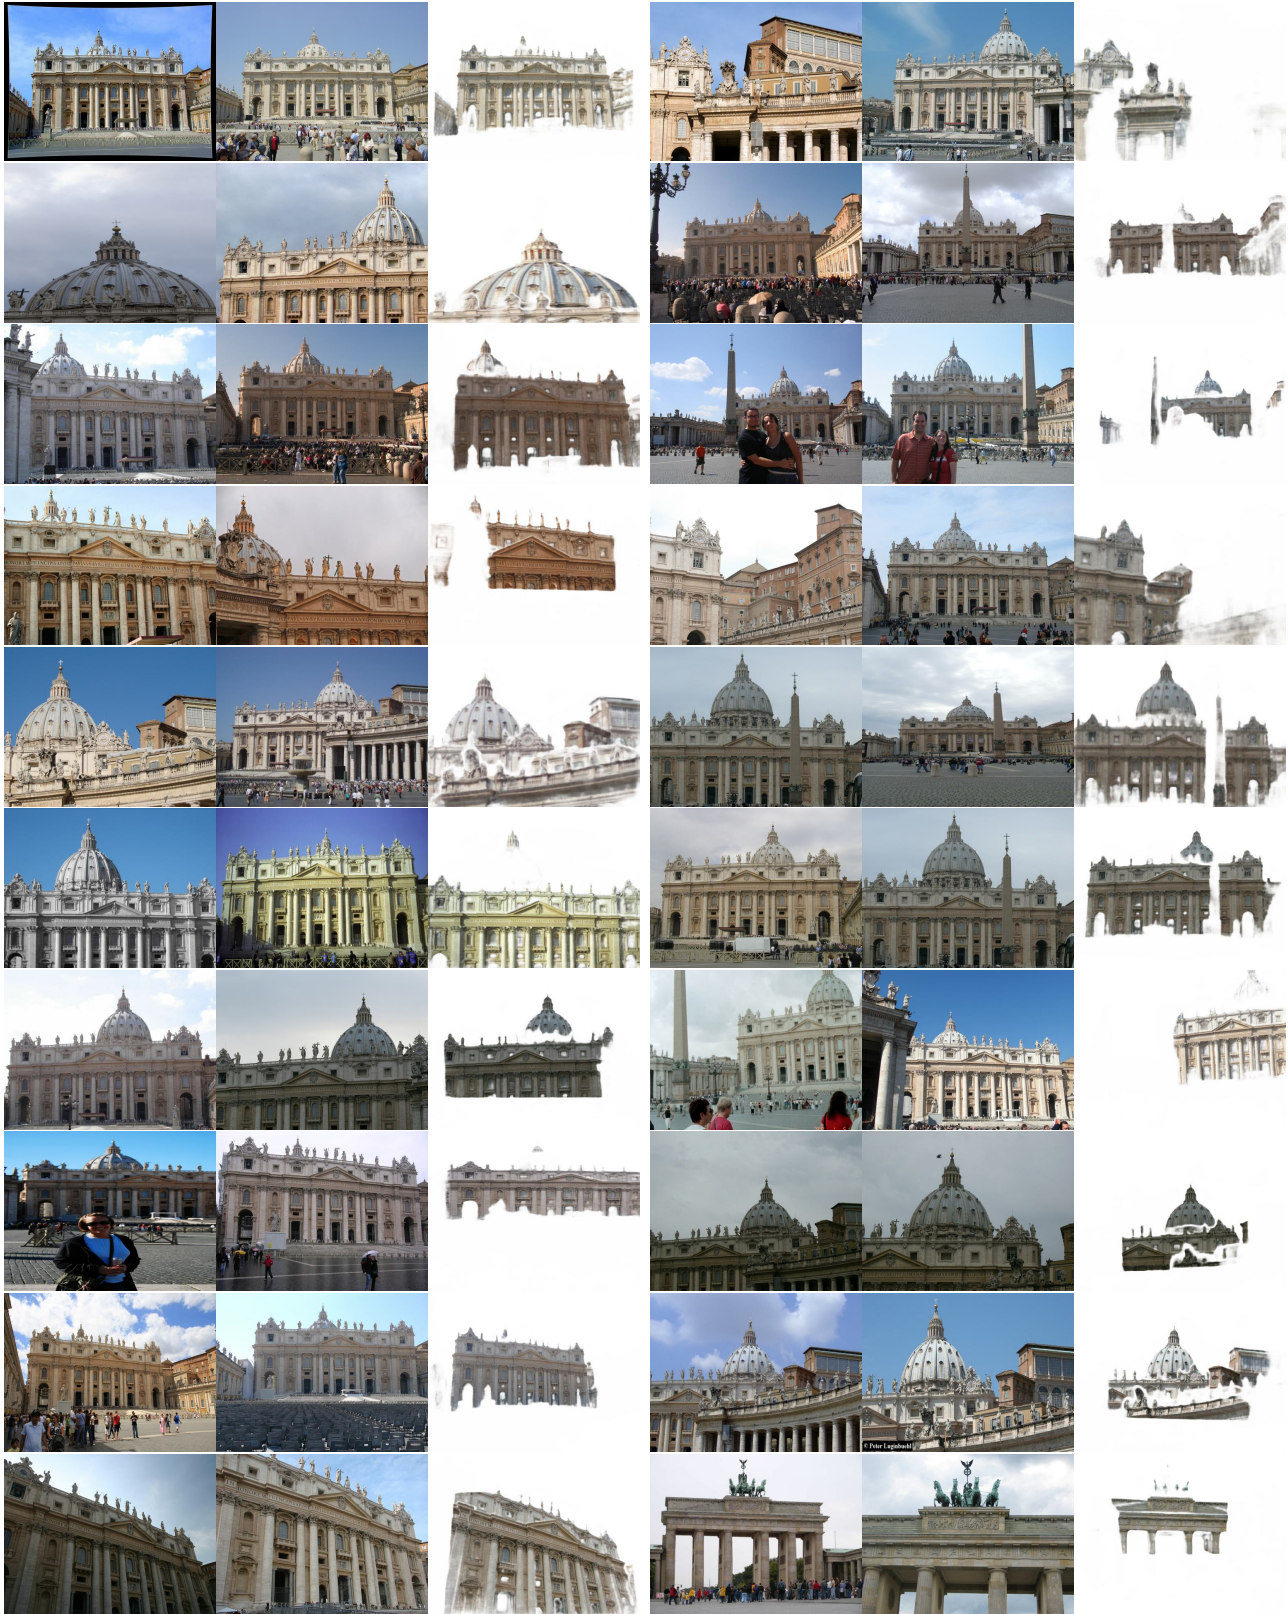

Figure 3. Visual Quality of the Reconstruction on MegaDepth [1].



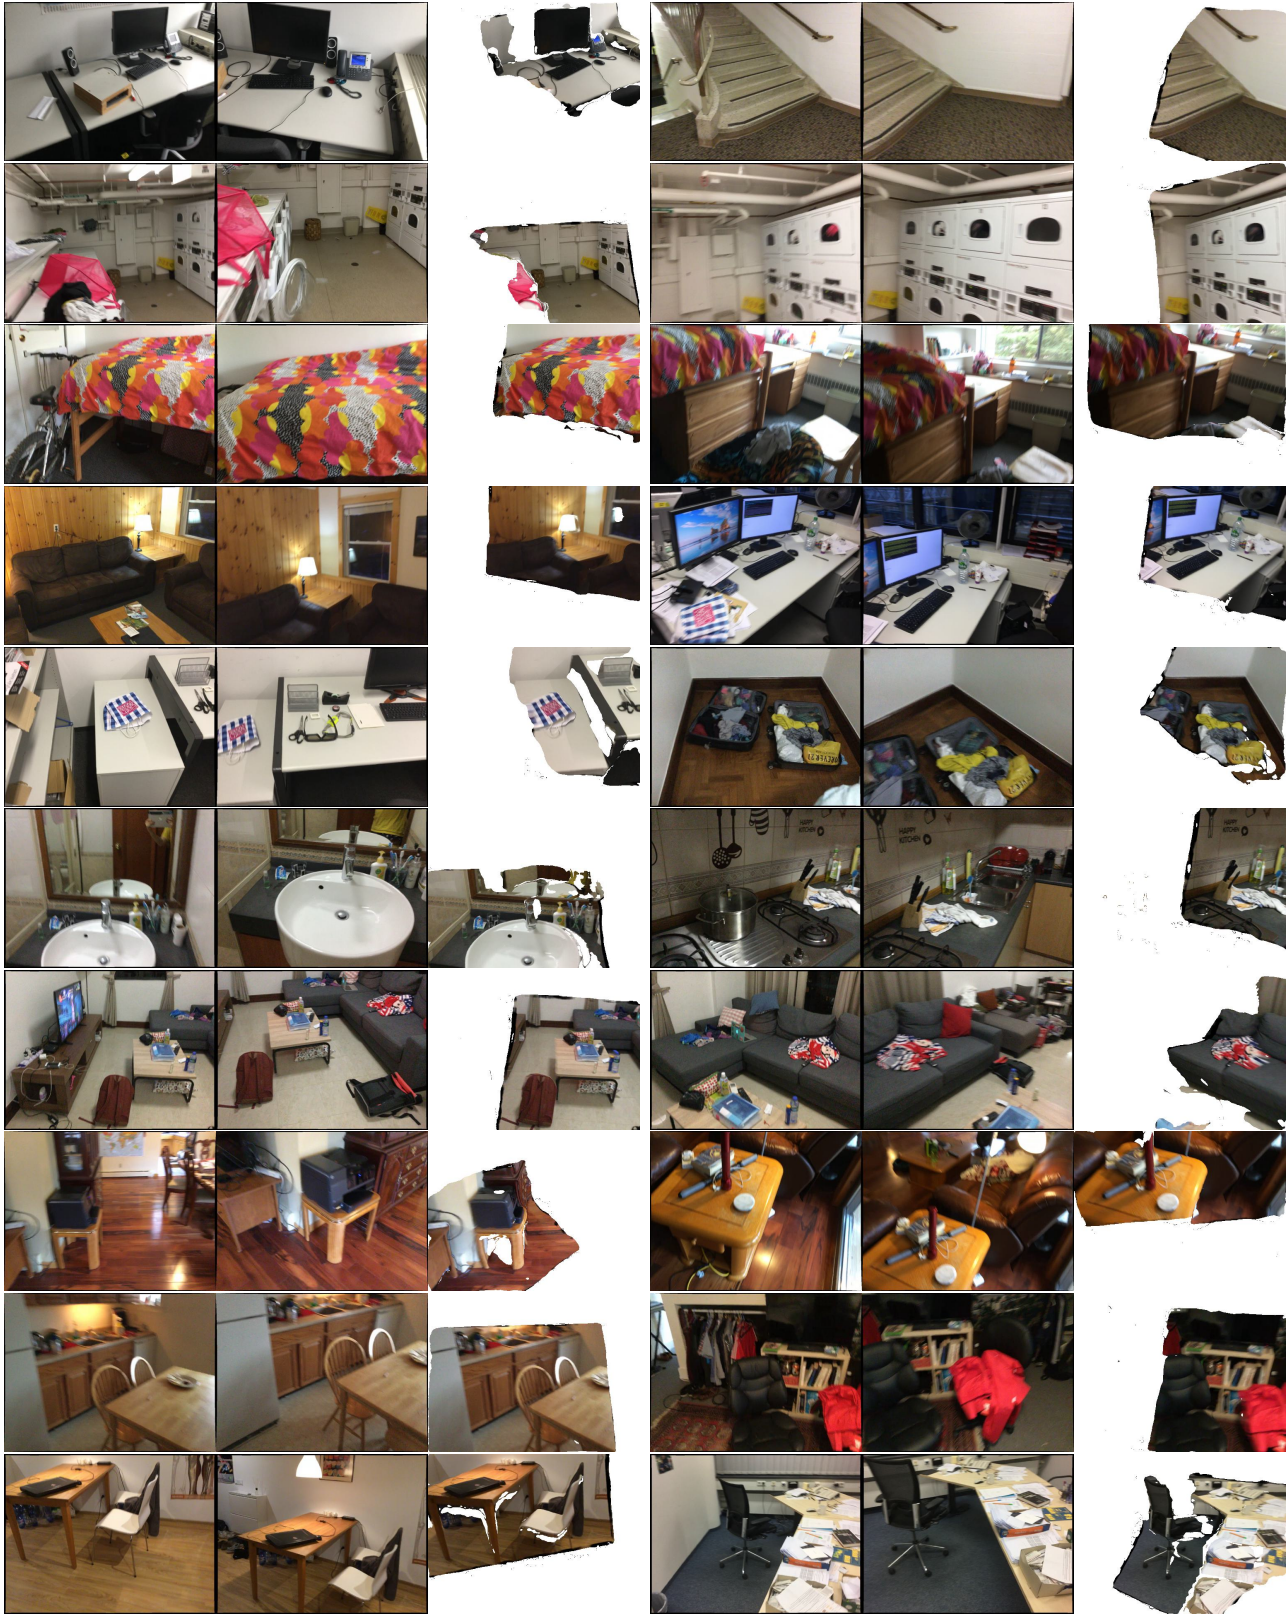

Figure 4. Visual Quality of the Reconstruction on ScanNet.
